# Supplementary material for: Robust encoding of natural stimuli by neuronal response sequences in monkey visual cortex
Source: Springer Nature journal article supplement (doi:10.1038/s41467-023-38587-2), 2023-05-25
Supplement: MOESM2 [file 41467_2023_38587_MOESM2_ESM.pdf]

### Robust Encoding of Natural Stimuli by Neuronal Response Sequences in Monkey Visual Cortex

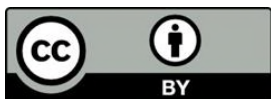

**Open Access** This file is licensed under a Creative Commons Attribution 4.0

International License, which permits use, sharing, adaptation, distribution and reproduction in any medium or format, as long as you give appropriate credit to

the original author(s) and the source, provide a link to the Creative Commons license, and indicate if changes were made. In the cases where the authors are anonymous, such as is the case for the reports of anonymous peer reviewers, author attribution should be to 'Anonymous Referee' followed by a clear attribution to the source work. The images or other third party material in this file are included in the article's Creative Commons license, unless indicated otherwise in a credit line to the material. If material is not included in the article's Creative Commons license and your intended use is not permitted by statutory regulation or exceeds the permitted use, you will need to obtain permission directly from the copyright holder. To view a copy of this license, visit <http://creativecommons.org/licenses/by/4.0/>.

## REVIEWER COMMENTS</B>

### Reviewer #1 (Remarks to the Author):

In their exciting study, Yiling Yang and colleagues examine population responses in monkey visual cortex. They find that responses can be ordered sequentially and that these sequences across variants of the task in which the latency and absolute intensities are parametrically manipulated. The fact that the dilation factor of the sequences did not change linearly with ramp duration is used to support the model that sequences may be the result of 'priors' or existent cortical wiring. Consistent with the involvement of recurrent cortical networks shaped by experience, the authors also found that normal stimuli resulted in faster and more robust responses than morphed or scrambled images. They also perform a simple 'proof of concept' recurrent network model and find that STDP leads to stimulus-specific response sequences.

Overall, I really liked this paper, and I can only suggest a few minor tweaks that can help to improve upon this work. It is well-written, broadly important, and timely – and I think it should be published in Nature Communications without much further modification.

### SUGGESTIONS:

It would be helpful to have more information concerning the data sets used for each figure. How many neurons were analyzed? How many sessions? Where were these neurons recorded? On this last point, I had assumed that Figures 1 & 2 were performed in V1, but the statement on Ln. 312 ('because these results were obtained in a higher visual area') suggests otherwise.

I would appreciate if population data from multiple single trials (maybe 10?) were presented to better appreciate the stability of the rank order of neurons across trials. I was envisioning something like an experimental version of Figure 4B.

The result about the persistence of the responses seems only peripherally related to the rest of the narrative. The authors should either try to integrate this section into the abstract and the discussion or drop it altogether. More broadly, it seems fitting that the story ends with the model (as is the case in the abstract).

The affiliation numbers for the authors do not appear to be correct.

A few relevant papers should be cited here: Rajan et al., Neuron, 2016 (a highly influential review on recurrent models and sequences); Kim et al., PNAS, 2016 (a demonstration that sequences can be experimentally established with experience); Elmaleh et al., Neuron, 2021 (a dissection of local and long-range influences on sequence generation in the songbird).

Ln. 184 – is Figure 1f the correct one to reference here?

Figure 1 – the gray tones for low and high intensity are very difficult to distinguish.

Ln. 234 – should be 'led' not 'lead'

Ln. 304 – why is the decoding accuracy higher for the fast ramp than the slow ramp condition?

Ln. 310 – authors should measure (if possible) whether the unnatural stimuli result in a less precisely timed sequence

The PCA plots in Figure 6A are difficult to parse. Can the three conditions be plotted separately?

Reviewer #2 (Remarks to the Author):

The basic ideas behind this paper are important and timely. They are right to point out that the vast majority of work in artificial neural networks uses models that have no interesting dynamics – processing is typically limited to feedforward propagation of floating-point numbers that are supposed to correspond to the firing rates of neurons. A seven-layer network such as AlexNet will process an image in exactly 7 (massively parallel) steps. And there is nothing of interest to learn from the dynamics.

Some labs, including DiCarlo's lab at MIT have reported that, unlike artificial networks, real networks show interesting dynamics that would not be explained by purely feedforward mechanisms. And they have argued that this is because of recurrent connectivity.

In the current paper, the authors make a similar claim. They describe interesting and reliable sequences of activation to both flashed images and images that are progressively ramped on either relatively quickly (over 500 ms) or more slowly (over 1 second). The data is certainly very interesting, and it is true that very few researchers have bothered to look for such phenomena.

My main problem with the paper as it stands is that they use these reliable sequences to argue that this can only be explained by recurrent connectivity within the cortex – much as DiCarlo has done.

But the problem is that even a simple feedforward spiking circuit will show reliable latency differences depending on physical characteristics of the stimulus. Remarkably, such latency variations were visible in the very first recordings of spiking activity from the optic nerve by Lord Adrian in 1927, but ignored by the vast majority of neurophysiologists for decades. However, a paper by Gollisch and Meister (Science, 2008) showed that the relative timing of spikes in retinal ganglion cells can be reliably used to transmit information. Contrast sensitive variations in latency are accepted as the explanation of the well-known Pulfrich Pendulum phenomenon – lowering contrast increases latency. Unless the authors think that this requires recurrent connections in the retina, I presume that they would have to agree that their claim in the discussion that there is “no experimental evidence for feedforward mechanisms capable of generating reliable sequence-based information” is simply not true.

For me, it seems clear that, even without any learning, and without any recurrent connections, you would expect that there would be reliable information in the relative order of firing across neurons. The authors admit that in the auditory system, temporal information is used (for sound localization), so it would be surprising if such phenomena were not also true for vision. And they cite a large number of studies in several sensory modalities that demonstrate temporal information.

The authors' belief that temporal sequences imply recurrent processing is made clear in the final conclusion where they argue that "the cerebral cortex complements the feedforward processing of rate-coded information by exploiting the dynamics of recurrent networks to generate a temporal code...". Do they really believe that a feedforward spiking network has no dynamics?

So, while the authors have done a great service to the community by looking in detail at the information that is contained in temporal dynamics, they overstep the mark by arguing that their findings can only be explained by recurrent processing.

To be clear, recurrent connections may indeed be very important and interesting to study, and those connections could indeed reflect learned information about stimuli. But even feedforward networks can learn. For example, Masquelier and Thorpe (PLoS 2007) showed that neurons equipped with STDP can become selective to faces and motorcycles even in purely feedforward networks. Furthermore, STDP leads to neurons responding faster and more reliably with repeated stimulation – exactly as they present authors note. But, again, no need for recurrent architectures.

The analysis based on the differences in the precise sequence with the three different types of stimulus was weak. Yes, they can rule out a simple model where a feedforward network of neurons with thresholds for firing that are fixed at a particular value of physical contrast. That is clearly not a good model. But the time to reach threshold for a leaky integrate and fire neuron depends on many factors. Changing the leakage will increase the time taken to reach threshold and produce all sorts of non-linearities that could also be consistent with those changes.

Overall, I found the conclusion that the "temporal sequences observed in the experiments resulted from interactions in a recurrent network in which the strengths of the coupling connections had been shaped by experience" too strong. The fact is that reliable temporal sequences to flashed or ramped stimuli would be obtained even in a feedforward neural network model with no recurrent connections. The main reason that such effects are not observed in the vast majority of current neural network models is that those models typically do not have spikes – they send floating point numbers that supposedly represent the neuron's firing rate instantaneously, totally removing the dynamics that immediately become interesting as soon as you start to take spiking seriously. Interesting dynamics, like the ones shown here, are not only limited to recurrent networks.

All this is rather regrettable, because as I stated, I think that this is a really interesting and original study. If the authors were to accept that feedforward networks can also have interesting dynamics, then I would be much happier to recommend publication.

I have a number of other comments.

Firstly, it was very unclear whether any of the channels corresponded to single neurons, or whether all the recordings were multiunit. If they can distinguish between these options, it would be interesting to see whether a small number of single units (rather than multiunit channels) could allow even more precise decoding. Indeed, to make the point, if you were to record from just 4 individual cells and looked at the ordering of firing, you would have 4! (24) different orders. In principle, those four cells could classify up to 24 different images.

Given the power of rank order coding, it is really unfortunate that the data set was collected with just 3 images – well below the number that could be decoded with just four neurons.

Using a small number of repeated images also makes it highly likely that the visual system could have learned about the statistics of those particular images, and this makes it harder to make conclusions about how the system would respond to unpredictable images. It would have been useful to have a condition where random images (selected from the ImageNet database for example) were shown. Would such images produce more (or perhaps less) neural activity than the highly predictable images used in the study? Would the authors predict that only the familiar stimuli would show interesting sequences? If they authors have any such data, it would greatly enhance the value of the data. My bet is that even a totally novel natural image would show clear and reliable sequences of activation. It might even show better reliability than scrambled images (as demonstrated here) but with no need for learning at all.

The use of just 3 stimuli also markedly reduces the power of the analysis. The decoder never has to choose between more than 3 stimuli and makes judgment in favor of one of the stimuli even when nothing is present. I would have preferred an analysis where the system had to initiate a three-choice response when there was enough information to conclude that a stimulus had been presented, and not simply choose which of the three stimuli is the most likely at every instant.

In the modelling study, I was puzzled by the statement that “Already at the beginning of training the networks produced sequences but that they were highly variable”. What would cause that variability? Was noise added to the activity? I would have thought that even the simplest neural model of center-

surround receptive fields in the retina would have latencies that would vary depending on the stimulus because higher local contrast lead to shorter latencies.

I was also surprised that the modelling was done with a relatively boring image of a digit. Why not use the natural images used for the study? And was the modelling done with a spiking neural network simulator? Or a conventional network that represents firing rates with floating point numbers? These are important issues that are currently unclear from the presentation.

The paper refers to values for the total spikes per second that are several thousands. This is a strange way to talk about the data, and is almost meaningless, because it is presumably calculated for an undefined and large number of channels and where is it unclear whether the channels refer to individual neurons or multiunit activity.

The authors also spend a lot of time discussing the information about peak latency for different channels. Indeed, much of the data in support of reliable sequences is built on the assumption that information about the peak latency in different channels could be used in the brain. It may be trivial for the experimenter to measure the latency of the peak. But firstly, this makes the basic assumption that rates are critical, whereas the whole point of rank order coding is to get away from rates. Secondly, I know of no plausible neurophysiological mechanism that could respond selectively to a peak at a particular latency. In my opinion, all that section could be dropped with no real loss. Onset latency variations across populations of neurons are by contrast intrinsically much more interesting, as well as being much faster to compute – as the authors point out.

So, in conclusion, I must admit that while interesting, the paper reaches conclusions that are not supported by the data.

1 **AUTHOR REMARK**

2 We wish to thank our reviewers for their sacrifice of time, their scrutiny and the many constructive  
3 suggestions that we now tried to incorporate into the revised version of our manuscript. Below we  
4 address the reviewers' comments (in black) point by point, mark our responses in green, and  
5 copy/paste here the corresponding revisions from the updated manuscript in blue. The revisions are  
6 also highlighted in the updated manuscript.

7 **REVIEWER COMMENTS**

8

9 Reviewer #1 (Remarks to the Author):

10

11 In their exciting study, Yiling Yang and colleagues examine population responses in monkey visual  
12 cortex. They find that responses can be ordered sequentially and that these sequences across  
13 variants of the task in which the latency and absolute intensities are parametrically manipulated.  
14 The fact that the dilation factor of the sequences did not change linearly with ramp duration is used  
15 to support the model that sequences may be the result of 'priors' or existent cortical wiring.  
16 Consistent with the involvement of recurrent cortical networks shaped by experience, the authors  
17 also found that normal stimuli resulted in faster and more robust responses than morphed or  
18 scrambled images. They also perform a simple 'proof of concept' recurrent network model and find  
19 that STDP leads to stimulus-specific response sequences.

20 Overall, I really liked this paper, and I can only suggest a few minor tweaks that can help to improve  
21 upon this work. It is well-written, broadly important, and timely – and I think it should be published  
22 in Nature Communications without much further modification.

23 We thank the reviewer for examining our manuscript and for his/her encouraging comments.

24

25 SUGGESTIONS:

26 It would be helpful to have more information concerning the data sets used for each figure. How  
27 many neurons were analyzed? How many sessions? Where were these neurons recorded? On this  
28 last point, I had assumed that Figures 1 & 2 were performed in V1, but the statement on Ln. 312  
29 ('because these results were obtained in a higher visual area') suggests otherwise.

30 We thank the reviewer for drawing our attention to this omission of important information. Indeed,  
31 we have forgotten to mention that all the results presented in the main text were obtained from  
32 area V4, and that all V1 results, which were very similar, are shown in the supplementary materials.  
33 Initially, the experiment was planned for area V4 but later we had the opportunity to extend and  
34 confirm the findings with experiments in V1 of two additional monkeys. V4 and V1 data were  
35 collected with chronically implanted 64- and 32-channel devices, respectively. We analysed all the  
36 channels (multi-unit activity) without sorting single neurons due to signal-to-noise constraints. V4  
37 experiments comprised in total 12 sessions (6 sessions per animal), and V1 experiments comprised 6  
38 sessions (3 per animal). This information and more essential details of the dataset have now been  
39 added in the appropriate paragraphs of the Results and Methods sections, and are also pasted  
40 below.

41 L128 (line number 128 in the revised manuscript, same convention below): Four awake macaque  
42 monkeys were presented with these stimuli in a passive viewing task and multi-unit activity (MUA)  
43 was recorded from visual area V4 in two monkeys with a 64-channel Utah array (Blackrock  
44 Microsystem, Salt Lake City, Utah, USA. Supplementary Figure 1) and from area V1 in another two

45 monkeys with a 32-channel Microdrive (Gray Matter Research, Bozeman, Montana, USA). We did  
46 not sort for single units and analyzed only MUA in this study. We present the findings obtained from  
47 area V4 in the main text and refer readers to the Supplementary Information for the results from  
48 area V1.

49 L766: In total, monkey H performed 2955 trials in 6 sessions ( $492.5 \pm 113.3$  (s.d.) trials per session, or  
50  $159.8 \pm 25.1$  trials per condition); monkey K performed 4679 trials in 6 sessions ( $779.8 \pm 209.9$  trials  
51 per session, or  $253.3 \pm 48.4$  trials per condition).

52 L778: In total, monkey A performed 3133 trials in 3 sessions ( $1044.3 \pm 52.7$  trials per session, or  
53  $1044.3 \pm 1.1$  trials per condition); monkey I performed 2418 trials in 3 sessions ( $806.0 \pm 391.6$  trials  
54 per session, or  $806.0 \pm 2.0$  trials per condition).

55 L810: Only MUA was analysed in this study.

56

57 I would appreciate if population data from multiple single trials (maybe 10?) were presented to  
58 better appreciate the stability of the rank order of neurons across trials. I was envisioning something  
59 like an experimental version of Figure 4B.

60 We agree with the reviewer and are generally in favour of presenting raw single-trial data. We had  
61 inspected our raster plots and single-trial histograms prior to averaging but realized that the single-  
62 trial spike data did not appear visually as striking and intuitive as the averaged data (Figure 1c&d) or  
63 simulated data (Figure 4b) because of the inherent variability of responses in awake animals  
64 (fluctuations of baseline activity, different response profiles and signal-to-noise levels across  
65 channels). We therefore decided to show averaged firing rate heat maps, as is commonly done in  
66 the literature to visualize sequences, and to complement these qualitative representations with  
67 extensive statistical quantification of the characteristic features of sequences.

68

69 The result about the persistence of the responses seems only peripherally related to the rest of the  
70 narrative. The authors should either try to integrate this section into the abstract and the discussion  
71 or drop it altogether. More broadly, it seems fitting that the story ends with the model (as is the case  
72 in the abstract).

73 We agree and could consider separating the results on persistence (V1 and V4) into a shorter paper  
74 or moving them into the supplement if the reviewers and the editor suggest doing so. However,  
75 these results provide additional support for the complementarity of rate and temporal codes, for the  
76 Bayesian matching operations and the dynamics of intracortical processing. Moreover, we needed to  
77 analyse rate codes during the initial transient for comparison with the rank code and would have to  
78 find a good reason why we limited these analyses to the phasic response components and did not  
79 include the sustained phase as well. We added sentences to the abstract and to the results to  
80 strengthen the conceptual link between the two sets of results.

81 L33: Support for such a matching process comes from the additional finding that stimulus-specific  
82 information persists longer in responses to natural than manipulated stimuli.

83 L285: Therefore, we expected that both the sequences and the rate vectors (see sections below)  
84 might reflect not only the structure of the stimuli but also the extent to which sensory evidence  
85 matched the priors stored in the architecture of the cortical networks.



86

87 The affiliation numbers for the authors do not appear to be correct.

88 Corrected.

89 Yang Yiling<sup>1,2,6</sup>, Katharine Shapcott<sup>1,3</sup>, Alina Peter<sup>1,2,6</sup>, Huang Xuhui<sup>4</sup>, Andreea Lazar<sup>1</sup>, Wolf Singer<sup>1,3,5\*</sup>

90 <sup>1</sup>Ernst Strüngmann Institute (ESI) for Neuroscience in Cooperation with Max Planck Society,  
91 Deutschordenstraße 46, 60528 Frankfurt am Main, Germany

92 <sup>2</sup>Faculty of Biological Sciences, Goethe-University Frankfurt am Main, Max-von-Laue-Str. 9, 60438  
93 Frankfurt am Main, Germany

94 <sup>3</sup>Frankfurt Institute for Advanced Studies, Ruth-Moufang-Str. 1, 60438 Frankfurt am Main, Germany

95 <sup>4</sup>Institute of Automation, Chinese Academy of Sciences, Zhongguancun East Road 95, 100190 Beijing,  
96 China

97 <sup>5</sup>Max Planck Institute for Brain Research, and <sup>6</sup>International Max Planck Research School (IMPRS) for  
98 Neural Circuits, Max-von-Laue-Str. 4, 60438 Frankfurt am Main, Germany

99

100 A few relevant papers should be cited here: Rajan et al., Neuron, 2016 (a highly influential review on  
101 recurrent models and sequences); Kim et al., PNAS, 2016 (a demonstration that sequences can be  
102 experimentally established with experience); Elmaleh et al., Neuron, 2021 (a dissection of local and  
103 long-range influences on sequence generation in the songbird).

104 The suggested citations have now been inserted in appropriate places.

105 L66: The dynamics of recurrent neural networks (RNNs) are exploited for computations in artificial  
106 RNNs (Buonomano and Maass, 2009; Jaeger and Haas, 2004; Lazar et al., 2021; Lazar et al., 2009;  
107 Maass et al., 2002; Rajan et al., 2016; Romera et al., 2018) but it is less clear to which extent  
108 biological RNNs capitalize on their dynamics to achieve specific functions (for review see Muller et al.  
109 (2018); Singer (2021)).

110 L646: As detailed above, the reciprocal connections between columns responding to features which  
111 have a high probability of being correlated in natural environments get strengthened through a  
112 Hebbian mechanism (Bosking et al., 1997; Galuske et al., 2019; Gilbert and Wiesel, 1989; Iacaruso et  
113 al., 2017; Kim et al., 2016; Löwel and Singer, 1992).

114 L564: Evidence that the timing of discharges matters in neuronal processing is available from studies  
115 in various systems: vision (Bruno and Sakmann, 2006; Burr and Ross, 1979; Delorme, 2003; Gawne et  
116 al., 1996; Gollisch and Meister, 2008; Gray et al., 1989; Havenith et al., 2011; Warzecha and  
117 Egelhaaf, 2000), audition (Carr and Konishi, 1990; Overholt et al., 1992), olfaction (Chong et al.,  
118 2020; Haddad et al., 2013; Junek et al., 2010; Smear et al., 2011; Spors and Grinvald, 2002; Spors et  
119 al., 2006; Wehr and Laurent, 1996; Wilson et al., 2017), somatosensation (Johansson and Birznieks,  
120 2004; Montemurro et al., 2007; Panzeri et al., 2001; Petersen et al., 2002), spatial navigation  
121 (O'Keefe and Recce, 1993; Pastalkova et al., 2008; Skaggs et al., 1996; Wilson and McNaughton,  
122 1994), and motor control (Daou and Margoliash, 2020; Egger et al., 2020; Elmaleh et al., 2021;  
123 Hahnloser et al., 2002; Yu and Margoliash, 1996).

124

125 Ln. 184 – is Figure 1f the correct one to reference here?

126 It was indeed not correct and is now corrected to Figure 1g.

127

128 Figure 1 – the gray tones for low and high intensity are very difficult to distinguish.

129 Indeed. We have now highlighted the contrast between the two intensity conditions in Figure 1e:

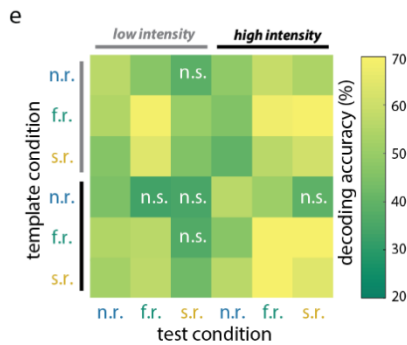

130

131 And Supplementary Figure 5:

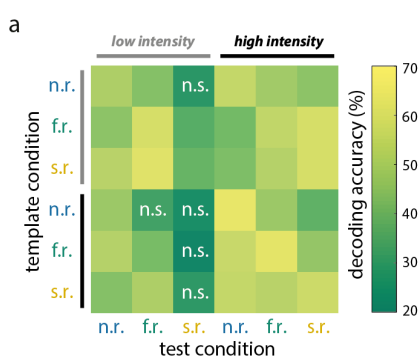

132

133

134 Ln. 234 – should be ‘led’ not ‘lead’

135 Corrected.

136 L242: It should be emphasized that even the no ramp condition led to decodable response sequences.

138

139 Ln. 304 – why is the decoding accuracy higher for the fast ramp than the slow ramp condition?

140 We had also expected that the decoding accuracy should improve with ramp duration. However,  
141 although the ramping diluted the tightly packed latencies of responses to sudden stimulus onset,  
142 there is apparently a limit to the benefits of ramping. This can have two reasons. First, the very  
143 gradual increase of stimulus intensity in the slow ramp condition may have limited the number of  
144 active neurons able to contribute to decoding. Despite increasing the ramp duration, most neurons  
145 still responded very early (c.f. Figure 1f&g, which underlines the nonlinear relationship between  
146 ramp duration and the temporal span of sequences). By the time the sequences were complete and  
147 recognized by the decoder, stimulus intensity was still low and this likely enhanced the variability  
148 and latency scatter of responses and may even have reduced the number of effectively contributing  
149 neurons. Second, in the slow ramp condition, the slowly rising firing rates are bound to impede the

150 ability of our algorithm to precisely determine the timing of responses. This increased variability  
151 likely also accounts for reduced decodability of slow ramp responses. Thus, there seems to be a  
152 trade-off between speed and accuracy. Had time and animal resources permitted, we would have  
153 liked to vary the ramp duration more systematically, in order to get a better estimation of the  
154 nonlinearity between ramp duration and neuronal responses.

155 We think this important question highlights the nonlinearity of neuronal responses and may also be  
156 of interest to other reader. Therefore we inserted our explanation into the Discussion section (L530).

157

158 Ln. 310 – authors should measure (if possible) whether the unnatural stimuli result in a less precisely  
159 timed sequence

160 We agree. We have tried to measure the variance of response timing of *individual channels/neurons*,  
161 pooled the variance across channels and compared the pooled variances of responses to the  
162 different stimulus categories. However, this measure, which is a rather insensitive metric as the  
163 reviewer has probably suspected, did not yield statistically significant differences. One probably has  
164 to develop more dedicated and elaborate measurements to evaluate the precision of response  
165 *sequences*, rather than the precision of single neuron response latencies.

166

167 The PCA plots in Figure 6A are difficult to parse. Can the three conditions be plotted separately?

168 We have added vertical offsets between trajectories of the three conditions.

169 Figure 6a:

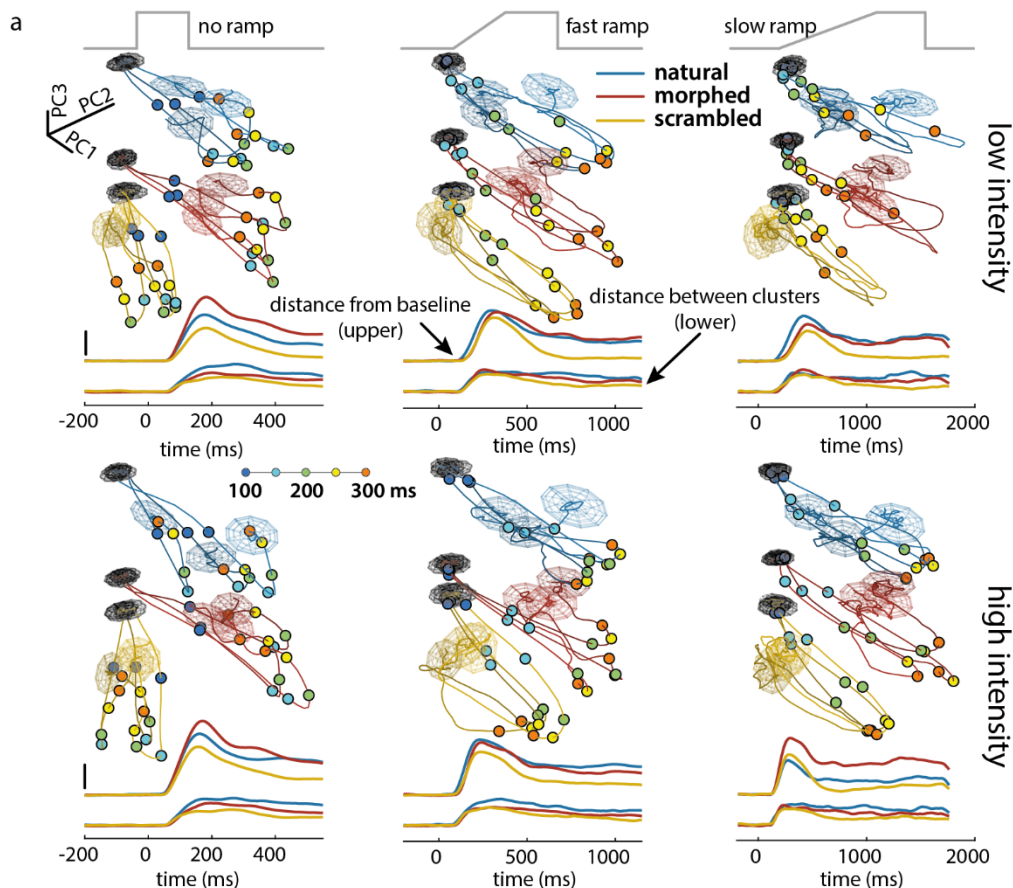

170

171 L465 (caption of Figure 6): Within each panel, trajectories of the three stimulus categories have been  
172 displaced vertically to reduce visual cluttering; otherwise the three baseline covariance meshes  
173 (black) should overlap.

174 Supplementary Figure 18a:

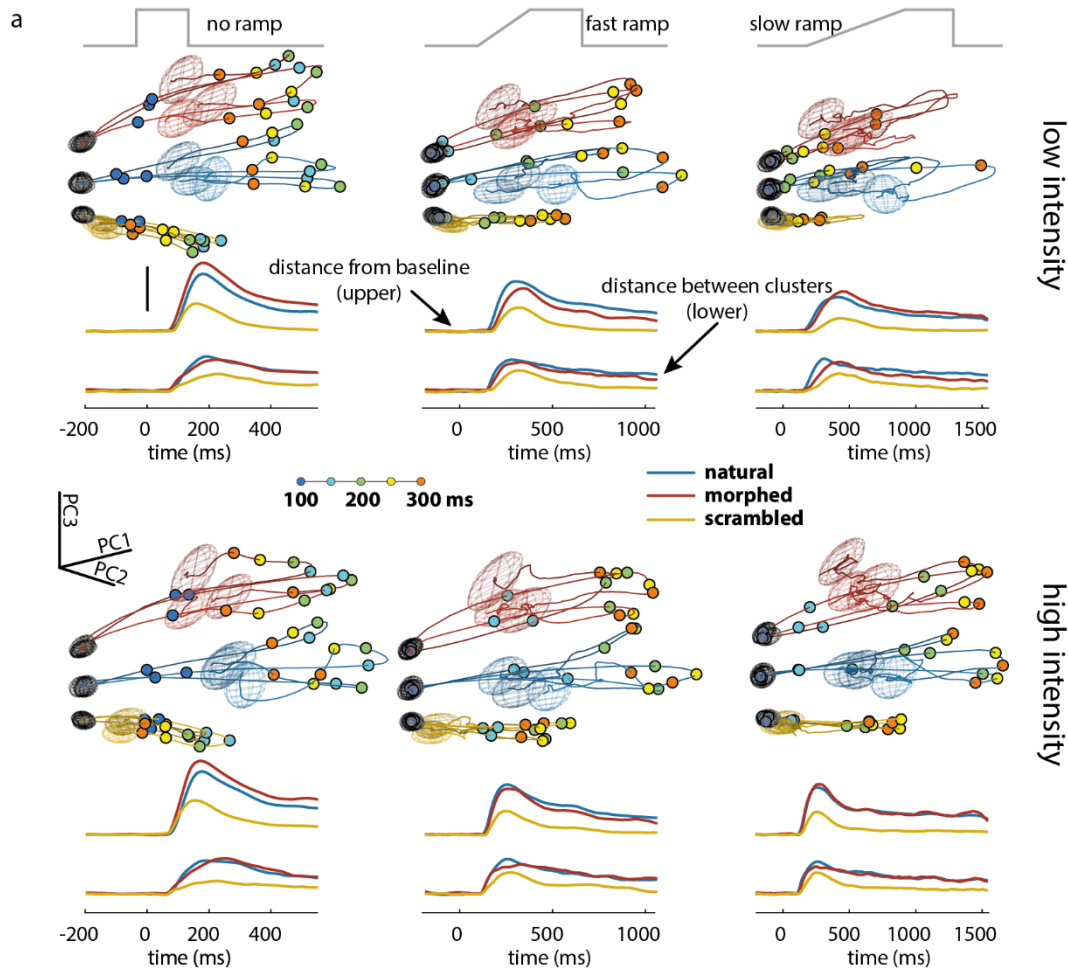

175

176

177

178

179

180

181

182 Reviewer #2 (Remarks to the Author):

183

184 The basic ideas behind this paper are important and timely. They are right to point out that the vast  
185 majority of work in artificial neural networks uses models that have no interesting dynamics –  
186 processing is typically limited to feedforward propagation of floating-point numbers that are  
187 supposed to correspond to the firing rates of neurons. A seven-layer network such as AlexNet will  
188 process an image in exactly 7 (massively parallel) steps. And there is nothing of interest to learn from  
189 the dynamics.

190

191 Some labs, including DiCarlo's lab at MIT have reported that, unlike artificial networks, real networks  
192 show interesting dynamics that would not be explained by purely feedforward mechanisms. And  
193 they have argued that this is because of recurrent connectivity.

194

195 In the current paper, the authors make a similar claim. They describe interesting and reliable  
196 sequences of activation to both flashed images and images that are progressively ramped on either  
197 relatively quickly (over 500 ms) or more slowly (over 1 second). The data is certainly very interesting,  
198 and it is true that very few researchers have bothered to look for such phenomena.

199 My main problem with the paper as it stands is that they use these reliable sequences to argue that  
200 this can only be explained by recurrent connectivity within the cortex – much as DiCarlo has done.

201 We thank the reviewer for examining our manuscript and for sharing his/her comments on and  
202 interpretations of our findings. We would like to make a few general remarks before responding to  
203 the reviewer's comments point by point.

204 After we had carefully studied the reviewer's comments, we feel that there is more agreement than  
205 dissent between the reviewer's and our interpretations with respect to the significance of our main  
206 findings: the stimulus specificity of response sequences, the option for fast read out of these  
207 sequences and their dependence on natural image statistics. However, we have certainly failed to  
208 consider in sufficient depth other mechanisms than recurrent processing for the generation of  
209 response sequences. In revising the manuscript we attempted to give more space to alternative  
210 hypotheses. Therefore, our responses to the reviewer's comments should not be seen as a rebuttal  
211 but rather as an attempt to discuss the pro and cons of different interpretations.

212 One of the reviewer's major concerns is that feedforward rather than recurrent networks could  
213 account for our findings. We have considered the possibility that the sequences were actually the  
214 consequence of feedforward mechanisms and have designed a number of control experiments to  
215 test this hypothesis but the result was, that simple versions of feedforward mechanisms fell short of  
216 explaining some features of the observed sequences. These features were the following. First, the  
217 preservation of sequence order despite changes in absolute latencies and despite changes in relative  
218 latencies that occurred with the compression and dilation of sequences. Second, the stability of  
219 sequences despite unavoidable changes in afferent drive caused by microsaccades. The fixation  
220 window allowed the monkey to make small eye movements and this likely had the effect that the  
221 correspondence between the contours of the stimuli and the neurons' receptive fields changed  
222 within a trial and between trials, likely causing variations of response latencies all along the  
223 feedforward transmission chain from the retina to V4. Third, the dependence of the persistence of  
224 the decodable rate responses on natural image statistics. We felt that these observations were  
225 better explained by reverberation in a recurrent network than by serial forward propagation of  
226 activity. Finally, a very simple and generic recurrent network model endowed with Hebbian synapses  
227 reproduced at least qualitatively most of our experimental findings without much parameter  
228 tweaking. Our control experiments do of course not exclude that a feedforward network endowed  
229 with a combination of complex nonlinear and hitherto unidentified transfer functions would be able  
230 to reproduce the highly adaptive dynamics revealed by our results. However, applying Occam's razor  
231 we opted for the most straight forward interpretation. We did not intend to rule out that specifically  
232 crafted feedforward models could reproduce some of our findings. This possibility is definitely worth  
233 further systematic investigation and confirmation.

234 We are well aware of the fact that concepts on visual processing emphasize serial feedforward  
235 processing in hierarchical architectures and that this notion is further supported by the success of  
236 deep neural networks that share this strategy. However, anatomical evidence indicates that in  
237 biological neural systems recurrent connections within and between the different areas of the  
238 processing hierarchy outnumber by far the feedforward connections. Furthermore, biological  
239 systems exhibit exceedingly complex dynamics that are absent in feedforward networks and can  
240 only be accounted for by recurrent processing. Accordingly, concepts emphasizing the importance of  
241 recurrence and dynamics are readily accepted in other fields of neuroscience. They serve as  
242 framework for studies on other systems of the vertebrate brain (e.g., other sensory systems,  
243 hippocampus and motor cortex) and for investigations of nervous systems of other species (e.g.,  
244 insects, worms and crustaceans). Because of the striking similarities between cortical areas, it seems  
245 plausible to assume that the visual system also relies on a combination of feedforward and recurrent  
246 processing.

247

248 But the problem is that even a simple feedforward spiking circuit will show reliable latency  
249 differences depending on physical characteristics of the stimulus. Remarkably, such latency  
250 variations were visible in the very first recordings of spiking activity from the optic nerve by Lord  
251 Adrian in 1927, but ignored by the vast majority of neurophysiologists for decades. However, a  
252 paper by Gollisch and Meister (Science, 2008) showed that the relative timing of spikes in retinal  
253 ganglion cells can be reliably used to transmit information. Contrast sensitive variations in latency  
254 are accepted as the explanation of the well-known Pulfrich Pendulum phenomenon – lowering  
255 contrast increases latency. Unless the authors think that this requires recurrent connections in the  
256 retina, I presume that they would have to agree that their claim in the discussion that there is “no  
257 experimental evidence for feedforward mechanisms capable of generating reliable sequence-based  
258 information” is simply not true.

259 We are very much in agreement with the reviewer that spike latencies can transmit information, and  
260 have indeed cited the work of Gollisch and Meister (Science, 2008) to support this notion. We also  
261 agree with the reviewer that physical characteristics of a stimulus like contrast can change spike  
262 latencies. Besides the original work by Lord Edgar Adrian, we would like to mention that a few years  
263 later Haldan Hartline also reported variations in optic nerve discharge latency in response to varying  
264 stimulus intensities (e.g., Hartline & Graham, 1932; Hartline 1938). In later related studies in the  
265 Limulus eye Hartline and Ratliff actually stated that an image stimulus could be reconstructed  
266 perfectly well from transforming absolute response latencies into luminance values. The authors  
267 mentioned that there were later response components (after-discharges) whose amplitude also  
268 signalled stimulus intensity and allowed image reconstruction. Interestingly, since then, the field has  
269 concentrated mainly on these "after-discharges". The stability of the retinal sequences, that are  
270 defined by absolute response latencies, does of course require that the contours of the stimulus  
271 always fall on exactly the same retinal loci - which was likely not the case in our experiments.

272 In our experiments, the texture of the stimuli contains high spatial frequencies and hence the  
273 luminance of the stimuli changes substantially over short distances. Because the animals perform  
274 microsaccades while they fixate, the luminance of the contours in the receptive fields is constantly  
275 changing. Therefore it is surprising that the sequences maintained the same rank order.  
276 Furthermore, the contrast differences between the *same* stimuli presented with different ramp  
277 conditions were much larger than the contrast differences between the *different* stimuli due to the  
278 low-contrast regime of our paradigm. Thus, if contrast played a major role, the correlation between  
279 onset latencies would be large between ramp conditions and small between stimuli, which is not the

280 case (c.f. Figure 1, Supplementary Figure 2 and Supplementary Figure 3). Variations in stimulus  
281 contrast also cannot explain the differences in stimulus specificity of response sequences between  
282 different types of stimuli (natural, morphed and scrambled), because stimulus onset kinetics were  
283 identical for all stimulus types. We have obviously failed to make clear that contrast dependent  
284 variations in latencies can *alone* not account for *all* the features of our response sequences  
285 (invariance to temporal compression and dilation, stability despite changing retinal correspondence,  
286 dependence on priors about natural image statistics).

287 We must have been imprecise in our writing because the reviewer assumes that we said "there is no  
288 experimental evidence for feedforward mechanisms capable of generating reliable sequence-based  
289 information" (last sentence of the reviewer's comments above). However, we stated in our  
290 discussion that "there are yet no experimental data in support of feedforward mechanism capable of  
291 generating response sequences, whose sequence order is invariant to temporal compression and  
292 dilation". We apologize for not having conveyed our position with the required clarity.

293

294 For me, it seems clear that, even without any learning, and without any recurrent connections, you  
295 would expect that there would be reliable information in the relative order of firing across neurons.  
296 The authors admit that in the auditory system, temporal information is used (for sound localization),  
297 so it would be surprising if such phenomena were not also true for vision. And they cite a large  
298 number of studies in several sensory modalities that demonstrate temporal information.

299 We agree with the reviewer that temporal information is used in many neural systems, as we have  
300 cited extensively. To the best of our knowledge, in other systems such as hippocampus, motor  
301 cortex, and auditory systems, it is usually assumed and even accepted that such temporal dynamics  
302 in neuronal responses emerged from recurrent networks. We cannot think of a good argument why  
303 such mechanisms should not hold in visual systems.

304

305 The authors believe that temporal sequences imply recurrent processing is made clear in the final  
306 conclusion where they argue that "the cerebral cortex complements the feedforward processing of  
307 rate-coded information by exploiting the dynamics of recurrent networks to generate a temporal  
308 code...". Do they really believe that a feedforward spiking network has no dynamics?

309 Again, we apologize for having been unclear in our writing. We do of course not deny that  
310 feedforward networks can produce sequences. As demonstrated very early on by Abeles in his work  
311 on synfire chains, strictly feedforward networks do generate informative sequences but to the best  
312 of our knowledge these sequences are not compressible and also lack the rich self-organizing  
313 dynamics observed in natural neuronal networks that are required to generate temporal codes.

314

315 So, while the authors have done a great service to the community by looking in detail at the  
316 information that is contained in temporal dynamics, they overstep the mark by arguing that their  
317 findings can only be explained by recurrent processing.

318 We have revised the manuscript to leave more room for alternative interpretations and emphasize  
319 the feedforward option at the very end of our concluding remarks.

320 L718: We have proposed recurrent processing as the most parsimonious explanation for the  
321 generation of response sequences and rank order codes. However, this does not exclude that

322 feedforward processing could have produced the same result. Any recurrent network can be  
323 unrolled in a multilayer feedforward network and with appropriate implementation of  
324 nonlinearities, such feed forward networks can in principle simulate recurrent processes (Kubilius et  
325 al., 2018; Liao and Poggio, 2016; Nayebi et al., 2018; Zamir et al., 2017). Our data do not allow us to  
326 distinguish between these possibilities but emphasize the putative importance of coding strategies  
327 exploiting temporal relations among neuronal responses.

328 L503: It is of course conceivable that feedforward networks can also reproduce our findings if  
329 endowed with the required mix of nonlinearities. However, to the best of our knowledge, there are  
330 yet no experimental data in support of feedforward mechanisms capable of generating response  
331 sequences, whose sequence order is invariant to temporal compression and dilation. Sequence  
332 generation is an intrinsic property of recurrent networks, and a very simple recurrent spiking  
333 network model could already reproduce many of our findings without extensive parameter tuning or  
334 handcrafting of nonlinearities. Therefore, we consider recurrent processing as the most  
335 parsimonious explanation of our results.

336 L148: This revealed that the stimulus-specific rank orders of response latencies were by and large  
337 preserved for the fast ramp condition although the absolute latencies had decreased, leading to a  
338 temporal compression of the sequences (diagonal panels in Figure 1d and Supplementary Figure 2b).

339 L197: This disproportional scaling of sequence span and of the latency distributions of the nodes'  
340 responses suggests that the two variables are not solely determined by stimulus parameters but  
341 depend also on network interactions. Further control analyses (Supplementary Information,  
342 Supplementary Figure 7 and Supplementary Figure 8) and simulation experiments (see below)  
343 support the notion that the sequences do not simply reflect the temporal structure of afferent  
344 signals nor their energy nor different sensitivities of the nodes to stimulus energy. Rather, the  
345 sequences seem to be shaped by or emerge from complex interactions within cortical networks.

346  
347

348 To be clear, recurrent connections may indeed be very important and interesting to study, and those  
349 connections could indeed reflect learned information about stimuli. But even feedforward networks  
350 can learn. For example, Masquelier and Thorpe (PLoS 2007) showed that neurons equipped with  
351 STDP can become selective to faces and motorcycles even in purely feedforward networks.  
352 Furthermore, STDP leads to neurons responding faster and more reliably with repeated stimulation  
353 – exactly as they present authors note. But, again, no need for recurrent architectures.

354 We agree with the reviewer that feedforward networks can learn. Our experiments were also very  
355 much inspired by Simon Thorpe's work, including the paper the reviewer referred to. As we read it,  
356 Masquelier and Thorpe (PLoS, 2007) demonstrated that spike latency can be used to represent visual  
357 features and to perform unsupervised learning via STDP. To train this small proof-of-concept  
358 network, the authors had to implement a winner-take-all strategy in certain layers (specifically,  
359 layers S1 and C1) and k-winner-take-all strategy in another layer (i.e., layer S2), by introducing local  
360 lateral inhibition. Although only required in the learning phase and thus not explicitly illustrated in  
361 the model structure, such lateral inhibition mimics already some recurrent interactions. Moreover,  
362 even this small "feedforward" model required dedicated handcrafting of structures and parameters,  
363 i.e., when to turn on lateral inhibition, which connections should undergo STDP (i.e., layers C1 to S2),  
364 whether to drop the leakage term, where to apply 1-winner-take-all and where to apply a k-winner-  
365 take-all mechanism. The resulting network was highly specialized and dedicated to a specific task. By  
366 contrast, recurrent networks can reproduce similar functions without much parameter tuning, and



367 remain adaptable for other tasks. Model simplicity and flexibility “biased” us to favour recurrent  
368 mechanisms. We agree that we should have acknowledged that feedforward network structures  
369 could also account for our results if they exploited the universe of nonlinearities and the virtually  
370 inexhaustible combinatorics of diverging and converging connections. Theoretically, any recurrent  
371 network can be unrolled into a feedforward network in which each time step of the reciprocal  
372 interactions is represented by a layer. We mention this now at the end of our discussion. However, if  
373 the recurrent network of a cortical area would have to be unrolled to capture the numerous virtually  
374 simultaneous interactions among the nodes this would require extremely deep networks. Given the  
375 time constants of neuronal processes, the conversion of the parallel computations of recurrent  
376 networks into serial computations in feedforward networks would be hard to reconcile with  
377 processing speed and hardware constraints. Even if we assume that the brain operates digitally at  
378 discrete time steps, it is not trivial to determine how many steps back in time a recurrent network  
379 should be unrolled. Biological neural networks need to perform computations flexibly across a wide  
380 range of timescales, from milliseconds to hours and beyond. One would have to convert a recurrent  
381 network into many, if not infinite, feedforward networks of different depths in order to cope with  
382 tasks of different time spans, significantly sacrificing flexibility.

383

384 The analysis based on the differences in the precise sequence with the three different types of  
385 stimulus was weak. Yes, they can rule out a simple model where a feedforward network of neurons  
386 with thresholds for firing that are fixed at a particular value of physical contrast. That is clearly not a  
387 good model. But the time to reach threshold for a leaky integrate and fire neuron depends on many  
388 factors. Changing the leakage will increase the time taken to reach threshold and produce all sorts of  
389 non-linearities that could also be consistent with those changes.

390 As we have acknowledged, we agree with the reviewer that feedforward networks with carefully  
391 designed nonlinearities could explain our data. More systematic investigations focused on this issue  
392 would be required but our methods do not allow us to perform such analyses. We could only show  
393 that it is not trivial to produce scalable sequences. We agree with the reviewer that leakage  
394 introduces time as coding space. However, in this case the predictions derived from comparisons of  
395 threshold passing with slow vs. fast ramps and low vs. high contrast stimuli would deviate even  
396 further from our measurements.

397

398 Overall, I found the conclusion that the “temporal sequences observed in the experiments resulted  
399 from interactions in a recurrent network in which the strengths of the coupling connections had  
400 been shaped by experience” too strong. The fact is that reliable temporal sequences to flashed or  
401 ramped stimuli would be obtained even in a feedforward neural network model with no recurrent  
402 connections. The main reason that such effects are not observed in the vast majority of current  
403 neural network models is that those models typically do not have spikes – they send floating point  
404 numbers that supposedly represent the neuron’s firing rate instantaneously, totally removing the  
405 dynamics that immediately become interesting as soon as you start to take spiking seriously.  
406 Interesting dynamics, like the ones shown here, are not only limited to recurrent networks.  
407 All this is rather regrettable, because as I stated, I think that this is a really interesting and original  
408 study. If the authors were to accept that feedforward networks can also have interesting dynamics,  
409 then I would be much happier to recommend publication.

410 In the original manuscript, we have acknowledged the possibility of feedforward mechanisms. As the  
411 reviewer suggested, we have now modified the manuscript to further strengthen this alternative  
412 explanation.

413 L718: We have proposed recurrent processing as the most parsimonious explanation for the  
414 generation of response sequences and rank order codes. However, this does not exclude that  
415 feedforward processing could have produced the same result. Any recurrent network can be  
416 unrolled in a multilayer feedforward network and with appropriate implementation of  
417 nonlinearities, such feed forward networks can in principle simulate recurrent processes (Kubilius et  
418 al., 2018; Liao and Poggio, 2016; Nayebi et al., 2018; Zamir et al., 2017). Our data do not allow us to  
419 distinguish between these possibilities but emphasize the putative importance of coding strategies  
420 exploiting temporal relations among neuronal responses.

421 L503: It is of course conceivable that feedforward networks can also reproduce our findings if  
422 endowed with the required mix of nonlinearities. However, to the best of our knowledge, there are  
423 yet no experimental data in support of feedforward mechanisms capable of generating response  
424 sequences, whose sequence order is invariant to temporal compression and dilation. Sequence  
425 generation is an intrinsic property of recurrent networks, and a very simple recurrent spiking  
426 network model could already reproduce many of our findings without extensive parameter tuning or  
427 handcrafting of nonlinearities. Therefore, we consider recurrent processing as the most  
428 parsimonious explanation of our results.

429

430 I have a number of other comments.

431

432 Firstly, it was very unclear whether any of the channels corresponded to single neurons, or whether  
433 all the recordings were multiunit. If they can distinguish between these options, it would be  
434 interesting to see whether a small number of single units (rather than multiunit channels) could  
435 allow even more precise decoding. Indeed, to make the point, if you were to record from just 4  
436 individual cells and looked at the ordering of firing, you would have 4! (24) different orders. In  
437 principle, those four cells could classify up to 24 different images.

438 We had mentioned that we recorded multi-unit activity (L129 and L806), and now also added  
439 explicitly that we did not sort for single units (L128, L810), mainly because of signal-to-noise  
440 considerations. As the reviewer pointed out, and we fully agree, one of the advantages of rank order  
441 coding is flexible permutation of network nodes, thus providing a virtually infinite coding space.  
442 Although we did not sort single units, we performed an extrapolation by examining to which extent  
443 the subset of earliest responding channels conveyed sufficient information for decoding stimulus  
444 identity (c.f. Figure 2). As predicted, only a handful of channels were needed to decode stimuli, and  
445 the decoding performance increased with more channels. We would predict in agreement with the  
446 reviewer that sorting single units would allow for more precise decoding.

447 L128: Four awake macaque monkeys were presented with these stimuli in a passive viewing task and  
448 multi-unit activity (MUA) was recorded from visual area V4 in two monkeys with a 64-channel Utah  
449 array (Blackrock Microsystem, Salt Lake City, Utah, USA. Supplementary Figure 1) and from area V1  
450 in another two monkeys with a 32-channel Microdrive (Gray Matter Research, Bozeman, Montana,  
451 USA). We did not sort for single units and analyzed only MUA in this study. We present the findings  
452 obtained from area V4 in the main text and refer readers to the Supplementary Information for the  
453 results from area V1.

454 L810: Only MUA was analysed in this study.

455 L245: We then determined how early, on average, each channel (node) started to respond, and  
456 systematically included more and more of the fastest responding channels (Methods). The decoding  
457 accuracy exceeded chance level as soon as more than 4 to 5 channels were included.

458

459 Given the power of rank order coding, it is really unfortunate that the data set was collected with  
460 just 3 images – well below the number that could be decoded with just four neurons.

461 We fully agree and would have loved to collect more data with more stimulus images. For this study,  
462 we required a large number of trials. First, we needed to test numerous conditions (no. images x  
463 intensity levels x ramp durations x stimulus categories). Second, we needed sufficient trials for the  
464 same condition to have enough training and independent test trials for the classifiers. Given the  
465 limited number of trials the monkeys can perform in a session and the constraint to maintain stable  
466 signal quality over days, we unfortunately had to prioritize repetitions over stimulus set size.

467

468 Using a small number of repeated images also makes it highly likely that the visual system could  
469 have learned about the statistics of those particular images, and this makes it harder to make  
470 conclusions about how the system would respond to unpredictable images. It would have been  
471 useful to have a condition where random images (selected from the ImageNet database for  
472 example) were shown. Would such images produce more (or perhaps less) neural activity than the  
473 highly predictable images used in the study? Would the authors predict that only the familiar stimuli  
474 would show interesting sequences? If they authors have any such data, it would greatly enhance the  
475 value of the data. My bet is that even a totally novel natural image would show clear and reliable  
476 sequences of activation. It might even show better reliability than scrambled images (as  
477 demonstrated here) but with no need for learning at all.

478 Previous work from our lab (Lazar et al., PNAS 2021; Peter et al., eLife 2021) examined the effect of  
479 learning through repetition or exposure. However, in the present study we did not require the  
480 animals to learn about specific images at short time scales (minutes to hours). The priors of natural  
481 scene statistics (e.g. Gestalt principles) should have already been embedded in the cortical networks  
482 through evolution and postnatal experience. Thus, unfamiliar stimuli (e.g. random novel images  
483 from ImageNet), as long as they comprise natural scenes and objects, should exhibit these  
484 fundamental statistics. Thus, in full agreement with the reviewer's prediction, familiar but also novel  
485 stimuli that match internal priors of natural scene statistics should produce more reliable and better  
486 decodable sequences than their scrambled versions. We also agree with the reviewer that any image  
487 can trivially produce sequential responses; it is the relationship between sequence decodability (or  
488 the "quality" of sequences) and the goodness of match between stimuli and internal priors that is  
489 particularly interesting for us. We should have emphasized this point.

490 Indeed over the course of the experiment the visual system may well have learned new statistics and  
491 installed additional priors about the repeated images, but such learning should also occur for  
492 morphed and scrambled images, and has hopefully been factored out when we compared between  
493 different groups of stimuli. However, it is of great interest to investigate more systematically how  
494 learning new visual priors depends on existing priors (Tse et al., Science, 2011 & 2007). We have in  
495 another very comprehensive simulation study (Effenberger et al, in prep) examined the effect of

496 initially installing very general Gestalt priors on later learning about specific images. We found that  
497 later learning profited substantially from being able to build on basic Gestalt priors.

498

499 The use of just 3 stimuli also markedly reduces the power of the analysis. The decoder never has to  
500 choose between more than 3 stimuli and makes judgment in favor of one of the stimuli even when  
501 nothing is present. I would have preferred an analysis where the system had to initiate a three-  
502 choice response when there was enough information to conclude that a stimulus had been  
503 presented, and not simply choose which of the three stimuli is the most likely at every instant.

504 It is unfortunately beyond our capacity to develop novel decoding algorithms that would yield  
505 quantitative comparisons between several stimuli. Therefore we decided to apply well established  
506 machine learning classifiers that are also widely used in neuroscience and that served our basic  
507 purpose of discriminating among stimuli. Using more stimuli would probably still run into similar  
508 issues since the classification algorithm is independent of the number of classes to be classified, as  
509 long as sufficient data are collected for training.

510

511 In the modelling study, I was puzzled by the statement that “Already at the beginning of training the  
512 networks produced sequences but that they were highly variable”. What would cause that  
513 variability? Was noise added to the activity? I would have thought that even the simplest neural  
514 model of center-surround receptive fields in the retina would have latencies that would vary  
515 depending on the stimulus because higher local contrast lead to shorter latencies.

516 Yes, background noise was added to the network (L868). Here we wanted to make two points: (1)  
517 learning reduces sequence variability, which might explain better decodability; (2) the network can  
518 reproduce temporally scalable sequences in response to linearly ramping input.

519

520 I was also surprised that the modelling was done with a relatively boring image of a digit. Why not  
521 use the natural images used for the study? And was the modelling done with a spiking neural  
522 network simulator? Or a conventional network that represents firing rates with floating point  
523 numbers? These are important issues that are currently unclear from the presentation.

524 We decided to describe technical details of the network in the Method section to avoid too much  
525 distraction on reading the main text. The spiking network model (L340 in Results, L859 in Methods)  
526 used Izhikevich neurons (L861 in Methods, all parameters included) and was simulated in custom-  
527 written MATLAB codes (L860, now also stated more explicitly). The network is not a firing rate  
528 model; otherwise, it would have been difficult to show raw spiking activity in Figure 4.

529 Indeed the modelling could have been more elaborate, but it was intended as a proof of concept so  
530 we took one of the most well-known stimulus sets (MNIST) as input.

531 L340: To explore the possibility that learning stabilizes temporal sequences in a stimulus-specific  
532 way, we trained a spiking neural network in a non-supervised way to acquire information about the  
533 shape of a digit (Figure 4. Methods).

534 L859: We simulated a recurrent spiking neural network of  $N = 250$  neurons where the ratio between  
535 excitatory and inhibitory neurons was 4:1 ( $N_e = 200$ ,  $N_i = 50$ , custom-written simulation in MATLAB).  
536 We used the Izhikevich model to simulate single neurons, whose parameters were the same as in

537 (Izhikevich, 2003). The excitatory cells were modelled as regular spiking cells (RS.  $(a, b) = (0.02, 0.2)$ .  
538  $(c, d) = (-65, 8) + (15, -6)*r^2$  where  $r$  is random variable of standard uniform distribution) and  
539 inhibitory neurons as fast spiking cells (FS.  $(a, b) = (0.02, 0.25) + (0.08, -0.05)*r^2$ .  $(c, d) = (-65, 2)$ ),  
540 each with random heterogeneity. All neurons were randomly connected with a connection  
541 probability of 40%. The connection strength was initialized to be uniformly distributed between  $[0,$   
542  $1]$ . To simulate external input current, we used MNIST digit images scaled to the size of 7-by-7, and  
543 mapped to a subset of 49 excitatory neurons. In addition, all neurons received random background  
544 noise as external input.

545

546 The paper refers to values for the total spikes per second that are several thousands. This is a  
547 strange way to talk about the data, and is almost meaningless, because it is presumably calculated  
548 for an undefined and large number of channels and where is it unclear whether the channels refer to  
549 individual neurons or multiunit activity.

550 We used “total spikes per second” to measure *population* firing rate, i.e., summed firing rate  
551 amplitudes across *all* channels, in the context of referring to the level of overall activity. Following  
552 the reviewer’s suggestion, we have averaged total spike counts across channels as is usual in  
553 neurophysiological studies and converted the values to “spikes per second”. All associated  
554 quantifications have also been re-calculated.

555 Figure 1b:

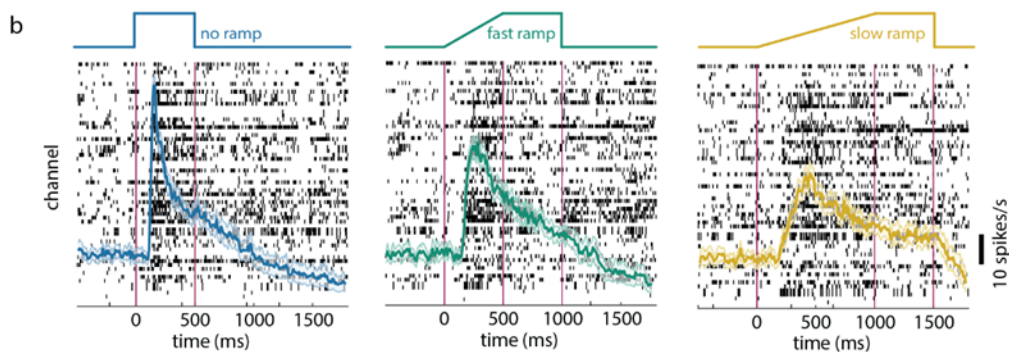

556

557 L209 (caption of Figure 1): Average firing rates for different ramp conditions. Raster plots of single-  
558 trial MUA responses to one of the three stimuli in the no ramp (left), fast ramp (middle), and  
559 slow ramp (right) condition. The colored traces show the average firing rate per channel for each ramp  
560 condition. Shaded areas denote 95% confidence level.

561 L135: The ramping stimuli reduced the peak amplitudes of the transient response components (no  
562 ramp  $51.57 \pm 0.44$  spikes/s, s.e.m.; fast ramp  $48.59 \pm 0.45$  spikes/s; slow ramp  $45.11 \pm 0.45$  spikes/s,  
563 corresponding to reductions of 5.8% and 12.5%, respectively; all stimulus and intensity conditions  
564 combined,  $F_{2,927} = 52.79$ ,  $p < 0.01$ , one-way ANOVA; all pair-wise comparisons  $p < 0.01$ ).

565 Figure 5 a&b:

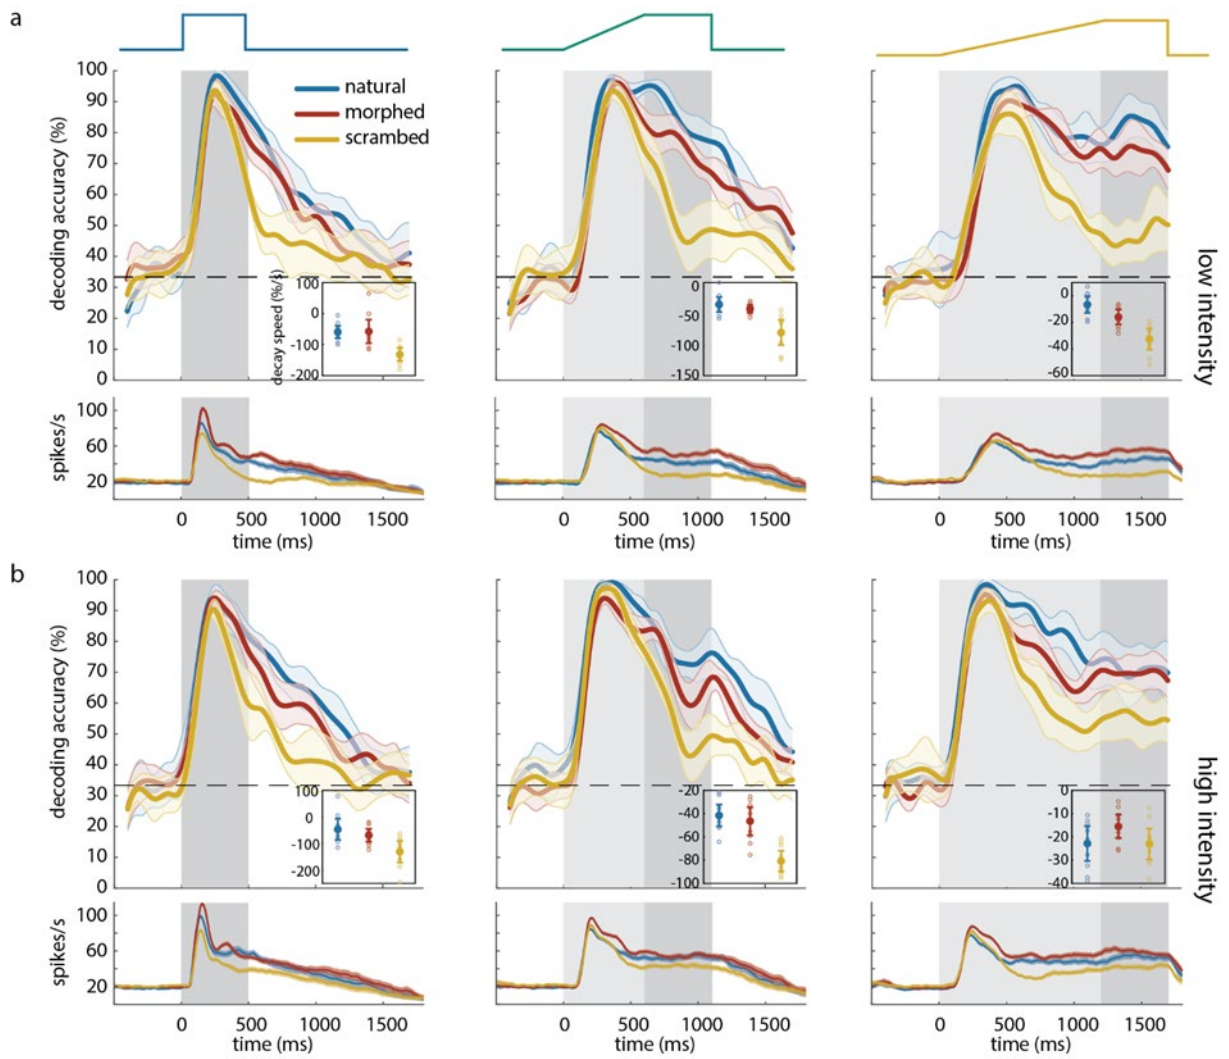

566

567 L415 (caption of Figure 5): Lower panels: corresponding average firing rates per channel.

568 L390: Stimulus-specific information reached its maximum at the same time as the firing rate

569 (average per channel, Figure 5 a & b).

570 Supplementary Figure 15:

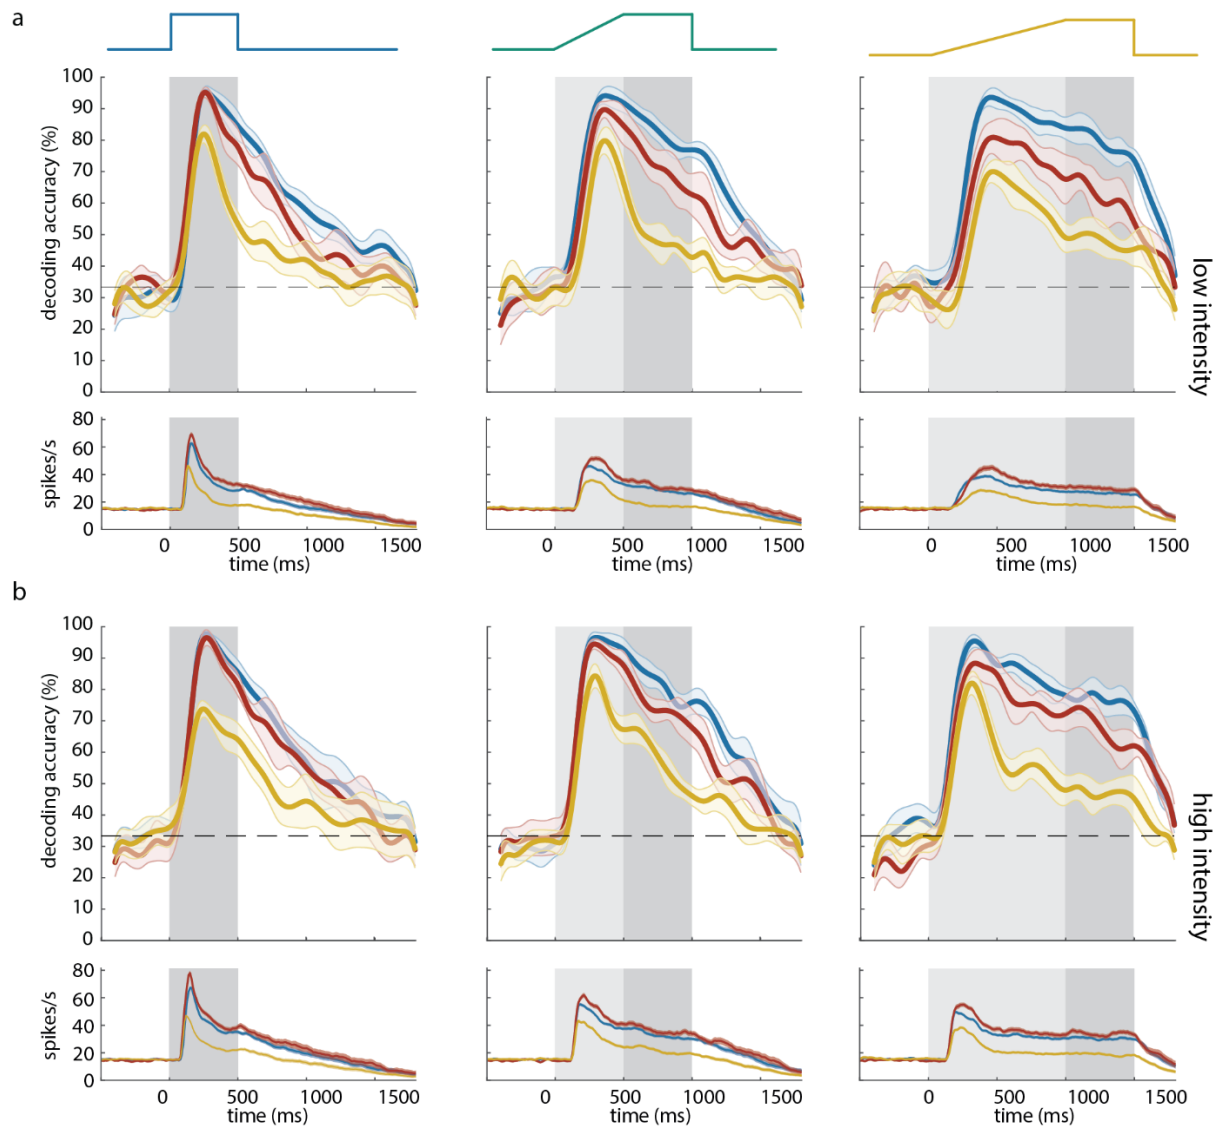

571

572

573 The authors also spend a lot of time discussing the information about peak latency for different  
 574 channels. Indeed, much of the data in support of reliable sequences is built on the assumption that  
 575 information about the peak latency in different channels could be used in the brain. It may be trivial  
 576 for the experimenter to measure the latency of the peak. But firstly, this makes the basic assumption  
 577 that rates are critical, whereas the whole point of rank order coding is to get away from rates.  
 578 Secondly, I know of no plausible neurophysiological mechanism that could respond selectively to a  
 579 peak at a particular latency. In my opinion, all that section could be dropped with no real loss. Onset  
 580 latency variations across populations of neurons are by contrast intrinsically much more interesting,  
 581 as well as being much faster to compute – as the authors point out.

582 We agree with the reviewer that onset latency is much more interesting and physiologically relevant.  
 583 We initially used peak latency as the measure of response timing to not deviate too radically from  
 584 conventions in the field, where neuronal response sequences are usually presented in heat maps of  
 585 firing rates sorted by peak amplitude positions. We fully agree with the reviewer and are aware of  
 586 the ambiguities inherent in decoding peak latencies. This is the reason why we designed a method  
 587 that allowed us to determine precise onset latencies. We would like to also present peak latencies,

588 even if this is redundant, because we anticipate readers familiar with conventional representations  
589 would ask for it.

590

591 So, in conclusion, I must admit that while interesting, the paper reaches conclusions that are not  
592 supported by the data.

593 We hope that we were able to demonstrate with our replies to the reviewer's concerns and with our  
594 revisions of the manuscript that the conclusions as they are formulated now are supported by the  
595 data and we wish to thank again the reviewer for helping us to identify ambiguities and to improve  
596 our writing.



## REVIEWER COMMENTS</B>

### Reviewer #1 (Remarks to the Author):

The authors have addressed my concerns satisfactorily. This work should be published and shared with the community.

### Reviewer #2 (Remarks to the Author):

The authors have worked hard to deal with the various points I raised in my review and I think that the paper is very much improved as a result.

Most of the points were dealt with well, and many of the questions have been answered in both the rebuttal and the modified manuscript.

That said, I still feel that the authors are overselling the strength of their evidence for recurrent mechanisms, although they have added many caveats which make their statements safer.

In the new version, they state that "to the best of our knowledge, there are yet no experimental data in support of feedforward mechanisms capable of generating response sequences, whose sequence order is invariant to temporal compression and dilation."

That may be the case, but only because almost no experimentalists have looked at the question! The fact is that even the simplest feedforward models would have to make that prediction. If you have a set of retinal ganglion cells responding to a flashed image, you would expect them to fire in a particular order that depended on how well the local image matched the receptive field – as shown by Gollisch and Meister, for example. True, those studies didn't look at what would happen if you changed the contrast, or ramped the image on slowly. But I would expect that the ordering information would be preserved, even in the face of such variations. Indeed, in 1998, Thorpe and Gautrais's proposals on Rank Order Coding took advantage of this by pointing out that the order in which the cells fired would remain the same despite wide variations in contrast and overall luminance. This is very close to the situation described here.

But we are talking about models - not experimental data.

So, no, I don't accept the authors' view that "recurrent processing as the most parsimonious explanation of response sequences and rank order codes". They argue that "Any recurrent network can be unrolled into a multilayer feedforward network and with appropriate implementation of nonlinearities, such feedforward networks can in principle simulate recurrent processes." This is one way of making feedforward models sound excessively complicated and hence tipping the balance in favour of recurrent mechanisms.

But I don't accept that you need multilayer networks with non-linearities to get sequences. Even a single layer of retinal ganglion cells will generate sequences in response to the onset of an image. You need integrate and fire, but nothing fancy. There is no need for anything else. And you would have to expect that the ordering in those sequences would remain stable even if you shifted contrast and luminance up and down.

All this is rather sad. The authors are to be commended on the fact that, at long last, there are experiments that have looked at these fascinating phenomena. And I really think that the data needs to be published. But I think that they really need to tone down even more their claims that sequences mean recurrent processing.

On the other points I made, I was happy to see that the authors accepted that there were a lot of limitations with the way the experiments were done. I think they know very well that the dataset would be far more interesting if they had included

- Single unit data rather than multiunit data
- Lots more images to avoid the criticism that 3 stimuli are not enough
- Track learning of a totally new image to see whether learning is needed for sequences (I don't believe it is).

I can't wait for the next dataset that deals with these limitations!

For the time being, I will just say that I would vote for publication of the current data with more caveats and the acceptance that sequences can be generated in a single layer network with no recurrent connections and nothing fancy in terms of non-linearities.

1 **REVIEWER COMMENTS (black colour)**

2 Reviewer #2 (Remarks to the Author):

3 The authors have worked hard to deal with the various points I raised in my review and I think that  
4 the paper is very much improved as a result.

5 Most of the points were dealt with well, and many of the questions have been answered in both the  
6 rebuttal and the modified manuscript.

7 That said, I still feel that the authors are overselling the strength of their evidence for recurrent  
8 mechanisms, although they have added many caveats which make their statements safer.

9 **AUTHOR RESPONSES (green colour)**

10 We thank the reviewer very much for the re-review of our paper. Following the reviewer's  
11 suggestion, we have further tuned down our interpretations, stating explicitly, that we do not wish  
12 to exclude that sequences could also be generated in feedforward networks. In addition, we added a  
13 reference to a recently published very extensive simulation study (Effenberger *et al.*, 2022) of a  
14 cortical network that might be of interest for our readers. Deleted sentences are marked in  
15 magenta. Added or modified sentences are marked in yellow.

16 As the reviewer had no further criticism of the results of our paper and voted for publication, we  
17 hope, that our revisions are now to the satisfaction of the reviewer.

18 In the new version, they state that "to the best of our knowledge, there are yet no experimental  
19 data in support of feedforward mechanisms capable of generating response sequences, whose  
20 sequence order is invariant to temporal compression and dilation."

21 We have deleted this sentence.

22 That may be the case, but only because almost no experimentalists have looked at the question! The  
23 fact is that even the simplest feedforward models would have to make that prediction. If you have a  
24 set of retinal ganglion cells responding to a flashed image, you would expect them to fire in a  
25 particular order that depended on how well the local image matched the receptive field – as shown  
26 by Gollisch and Meister, for example. True, those studies didn't look at what would happen if you  
27 changed the contrast, or ramped the image on slowly. But I would expect that the ordering  
28 information would be preserved, even in the face of such variations. Indeed, in 1998, Thorpe and  
29 Gautrais's proposals on Rank Order Coding took advantage of this by pointing out that the order in  
30 which the cells fired would remain the same despite wide variations in contrast and overall  
31 luminance. This is very close to the situation described here.

32 We added a paragraph in the discussion under "Methodological considerations" where we indicated  
33 the shortcomings of our approach to distinguish between feedforward and recurrent processing and  
34 propose experiments to accomplish this distinction. Here we now also mention as a methodological  
35 limitation that we used only few stimuli and recorded only multi-unit activity.

36 But we are talking about models - not experimental data.

37 So, no, I don't accept the authors' view that "recurrent processing as the most parsimonious  
38 explanation of response sequences and rank order codes". They argue that "Any recurrent network  
39 can be unrolled into a multilayer feedforward network and with appropriate implementation of  
40 nonlinearities, such feedforward networks can in principle simulate recurrent processes." This is one

41 way of making feedforward models sound excessively complicated and hence tipping the balance in  
42 favour of recurrent mechanisms.

43 But I don't accept that you need multilayer networks with non-linearities to get sequences. Even a  
44 single layer of retinal ganglion cells will generate sequences in response to the onset of an image.  
45 You need integrate and fire, but nothing fancy. There is no need for anything else. And you would  
46 have to expect that the ordering in those sequences would remain stable even if you shifted contrast  
47 and luminance up and down.

48 All this is rather sad. The authors are to be commended on the fact that, at long last, there are  
49 experiments that have looked at these fascinating phenomena. And I really think that the data needs  
50 to be published. But I think that they really need to tone down even more their claims that  
51 sequences mean recurrent processing.

52 We have now tuned down our claims at numerous places throughout the manuscript and  
53 emphasize, that we cannot distinguish between feedforward and recurrent mechanisms (These  
54 passages are marked in yellow). However, since the main motivation for the study was our previous  
55 work on recurrent processing, we had to formulate our working hypothesis in the introduction. This  
56 hypothesis was based on predictions derived from recurrent processing. Therefore, it was  
57 unavoidable to discuss, whether our results are or are not compatible with our initial hypothesis.  
58 Otherwise we would have betrayed our motivation to initiate this study.

59 On the other points I made, I was happy to see that the authors accepted that there were a lot of  
60 limitations with the way the experiments were done. I think they know very well that the dataset  
61 would be far more interesting if they had included

62 - Single unit data rather than multiunit data

63 - Lots more images to avoid the criticism that 3 stimuli are not enough

64 These two limitations have now been mentioned (see above).

65 - Track learning of a totally new image to see whether learning is needed for sequences (I don't  
66 believe it is).

67 This is correct. Recurrent networks always produce sequences. We now emphasize that our  
68 simulated network already generated sequences in the naive state, and that these sequences  
69 became refined by learning, which improved their decodability.

70 For the time being, I will just say that I would vote for publication of the current data with more  
71 caveats and the acceptance that sequences can be generated in a single layer network with no  
72 recurrent connections and nothing fancy in terms of non-linearities.

73 We deleted the reference to nonlinearities and hope to have now added sufficient caveats.

## REVIEWERS' COMMENTS

Reviewer #2 (Remarks to the Author):

I think that the additional caveats mean that the authors are no longer making unsubstantiated claims, and I am therefore happy to recommend publication.

I very much look forward to seeing further work on this important topic using protocols that go beyond the limitations of the current experiments.
